# Supplementary material for: Salt induction and activation of MtlD, the key enzyme in the synthesis of the compatible solute mannitol in Acinetobacter baumannii
Source: PubMed Central journal article supplement (PMC6291793; doi:10.1002/mbo3.614), 2018-03-24
Supplement: MBO3-7-e00614-s001.pdf [file MBO3-7-e00614-s001.pdf]

## S. 1. Primers used in the study

| Primer name      | Sequence 5' → 3'                       | Application                              |
|------------------|----------------------------------------|------------------------------------------|
| mtlD_up_fwd      | GTTAGCGGCCGCAACAGCTTGAGGATATGCAGAG     | Deletion of <i>mtlD</i><br>in ATCC 19606 |
| mtlD_up_rev      | GCCGGGATCCCTTTGGACATTAAGTCGAAC         |                                          |
| mtlD_down_fwd    | CTGCGGATCCCATCCATATCGAAGATAGCTC        |                                          |
| mtlD_down_rev    | GTTGCTGCAGGTACTACGCTTCTACCAAACC        |                                          |
| mtlD_ctr_fwd     | GCTGTACCGCAGTCAATCAC                   |                                          |
| mtlD_ctr_rev     | GTGTCGTTCTGGTGCCAGAAG                  |                                          |
| mtlD_fwd         | GCCGCATATGGTGCTTATTTTTTCATGGAAAACC     | MtlD purification                        |
| mtlD_rev         | ATGGCGCGGCCGCAACATATTGAGTTGATGTAGTTTTG |                                          |
| mtlD_up_gusA_fwd | GGCGTCTAGAGCCGAAATTTATGAAGGGAAGC       | Reporter gene<br>assay                   |
| mtlD_up_gusA_rev | CGCGCCATGGGTTTTTACCTCTTTTTTGATCATG     |                                          |
